# Supplementary material for: Enhancing bifunctional catalytic activity of cobalt–nickel sulfide spinel nanocatalysts through transition metal doping and its application in secondary zinc–air batteries
Source: Royal Society of Chemistry journal article supplement (doi:10.1039/d0ra08363a), 2020-01-01
Supplement: d0ra08363a1.pdf [file d0ra08363a1.pdf]

## Electronic Supplementary Information

### Enhancing Bifunctional Catalytic Activity of Cobalt Nickel Sulfide Spinel Nanocatalysts through Transition Metal Doping and its Application in Secondary Zinc-Air Batteries

Yijie Xu,<sup>a,b</sup> Afriyanti Sumboja,<sup>c,\*</sup> Alexandra Groves,<sup>a</sup> Thomas Ashton,<sup>a</sup> Yun Zong,<sup>b,\*</sup> Jawwad A. Darr,<sup>a,\*</sup>

<sup>a</sup> *Department of Chemistry, University College London, 20 Gordon Street, London WC1H 0AJ, United Kingdom*

<sup>b</sup> *Institute of Materials Research and Engineering (IMRE), A\*STAR Agency for Science, Technology and Research, 2 Fusionopolis Way, Innovis #08-03, 138634, Singapore*

<sup>c</sup> *Material Science and Engineering Research Group, Faculty of Mechanical and Aerospace Engineering, Institut Teknologi Bandung, Jl. Ganesha 10 Bandung 40132, Indonesia*

\*Corresponding authors

**Email:** [j.a.darr@ucl.ac.uk](mailto:j.a.darr@ucl.ac.uk); [Zong\\_Yun@hq.a-star.edu.sg](mailto:Zong_Yun@hq.a-star.edu.sg); [afriyanti.sumboja@material.itb.ac.id](mailto:afriyanti.sumboja@material.itb.ac.id)

## S1. Schematic of continuous hydrothermal flow synthesis

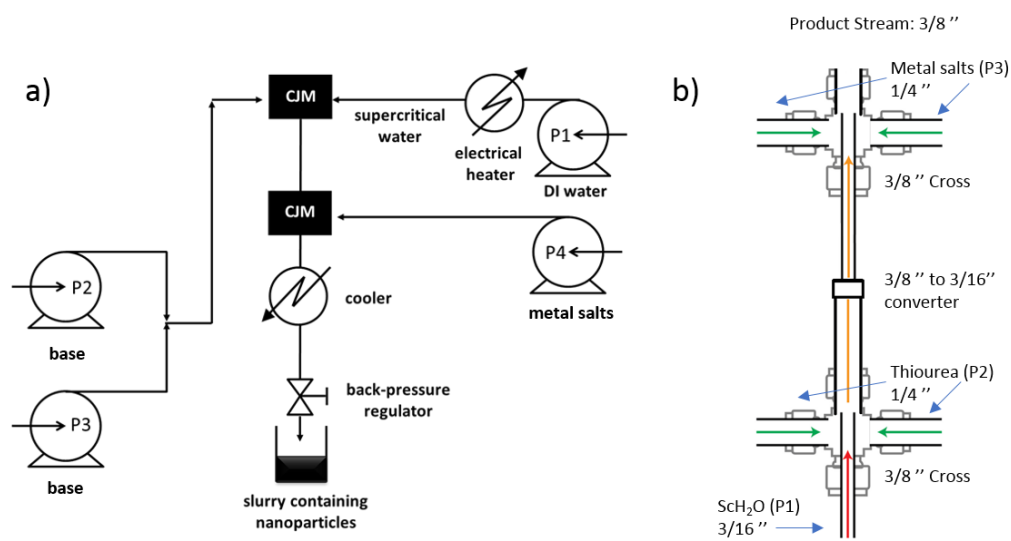

**Fig. S1** Diagram of the (a) laboratory-scale CHFS apparatus and (b) dual CJM mixer setup.

S2. Digital image of the battery tester and the Zn-air battery

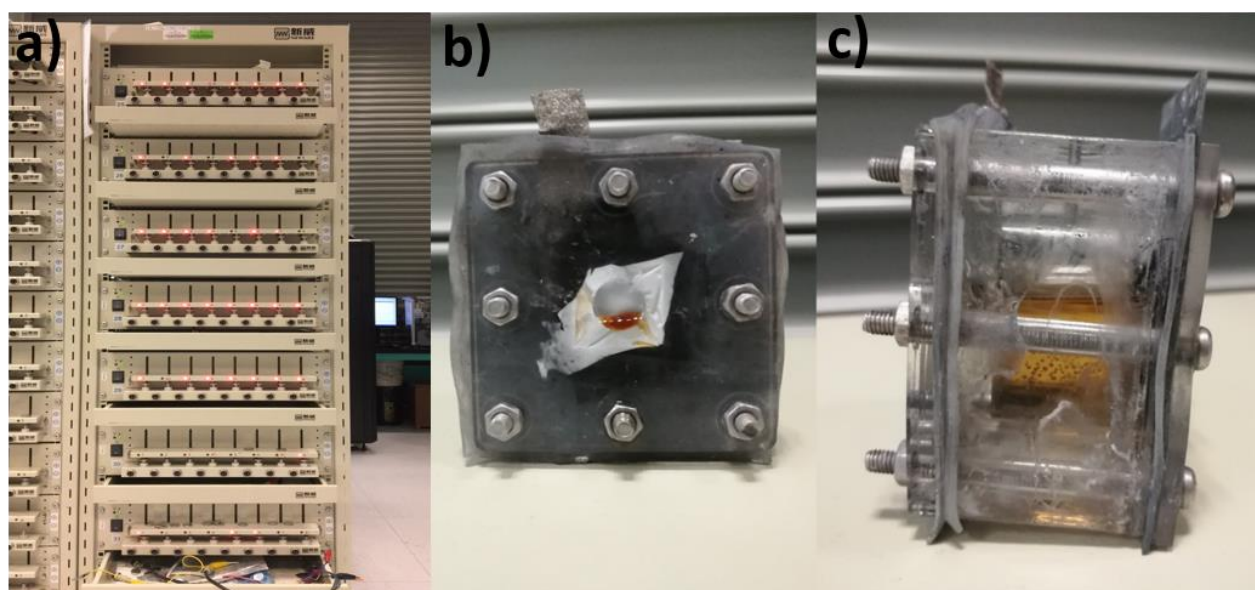

**Fig. S2** a) Illustration of the Neware battery tester (Model V5, China). b) and c) the home-made Zinc-Air cell

### S3. EDS mapping and STEM measurement of the samples

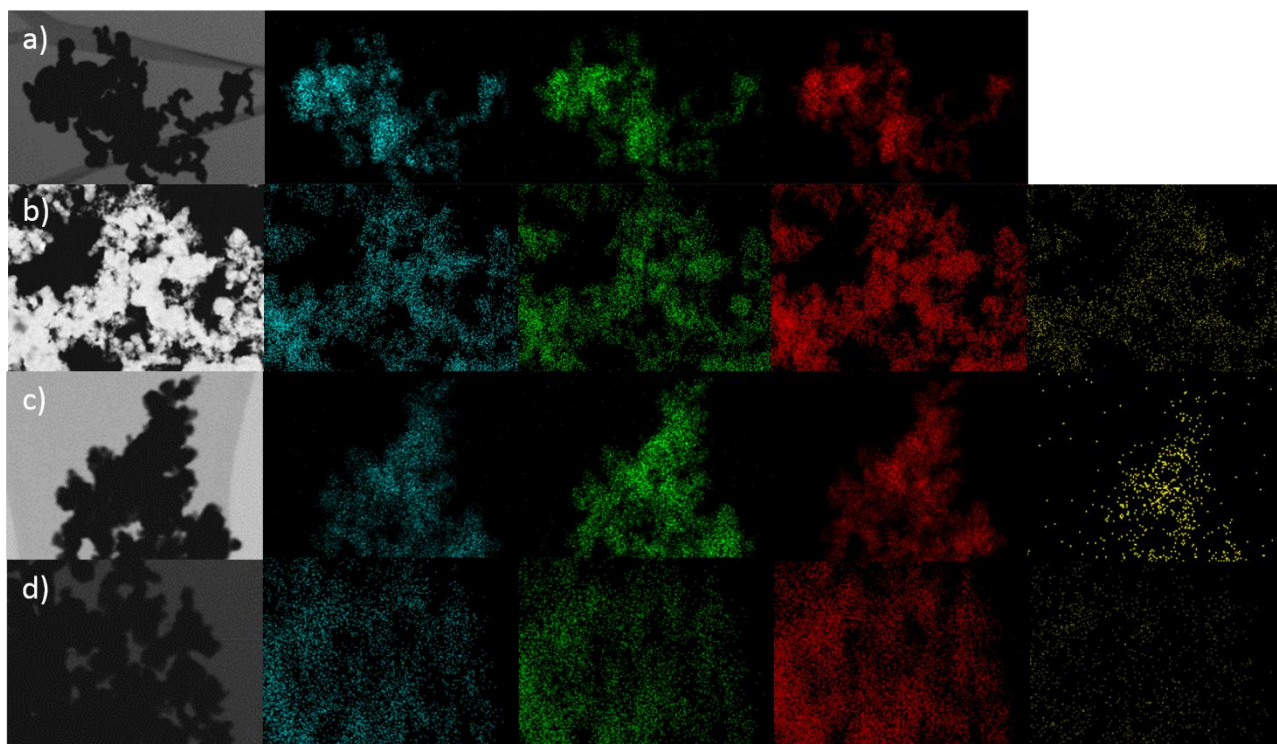

**Fig. S3** EDS Mapping of the a) undoped, b) chromium-doped, c) manganese-doped, d) iron-doped nickel-cobalt sulfide samples, with nickel (blue), cobalt (green), sulfur (red), and their respective dopants (yellow) shown together with the reference STEM image.

#### S4. XPS measurement of the remaining samples

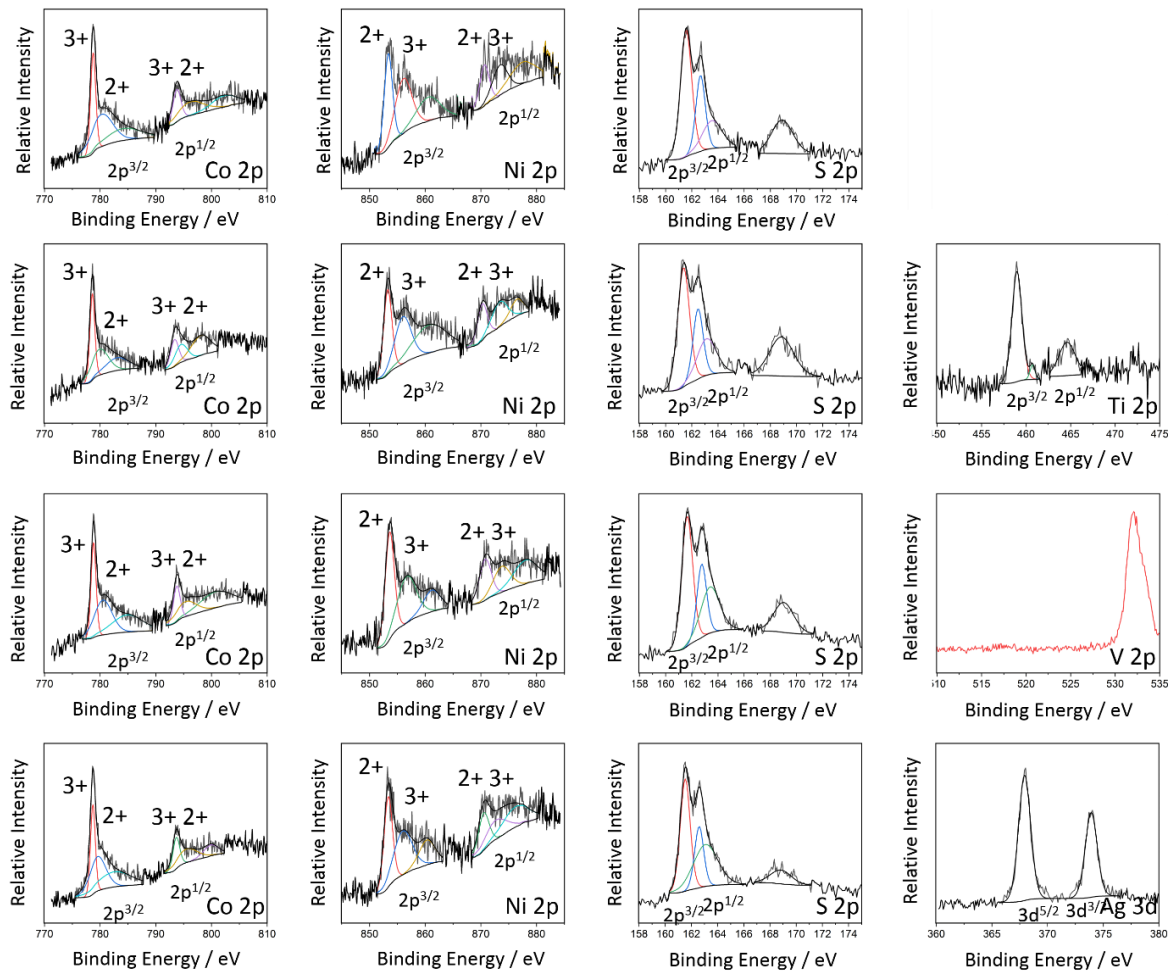

**Fig. S4** XPS spectra of the undoped, titanium-, vanadium-, and silver-doped cobalt nickel sulfide samples belonging to the cobalt, nickel, sulfur, and their respective dopant species.

## S5. Electrochemical characterizations

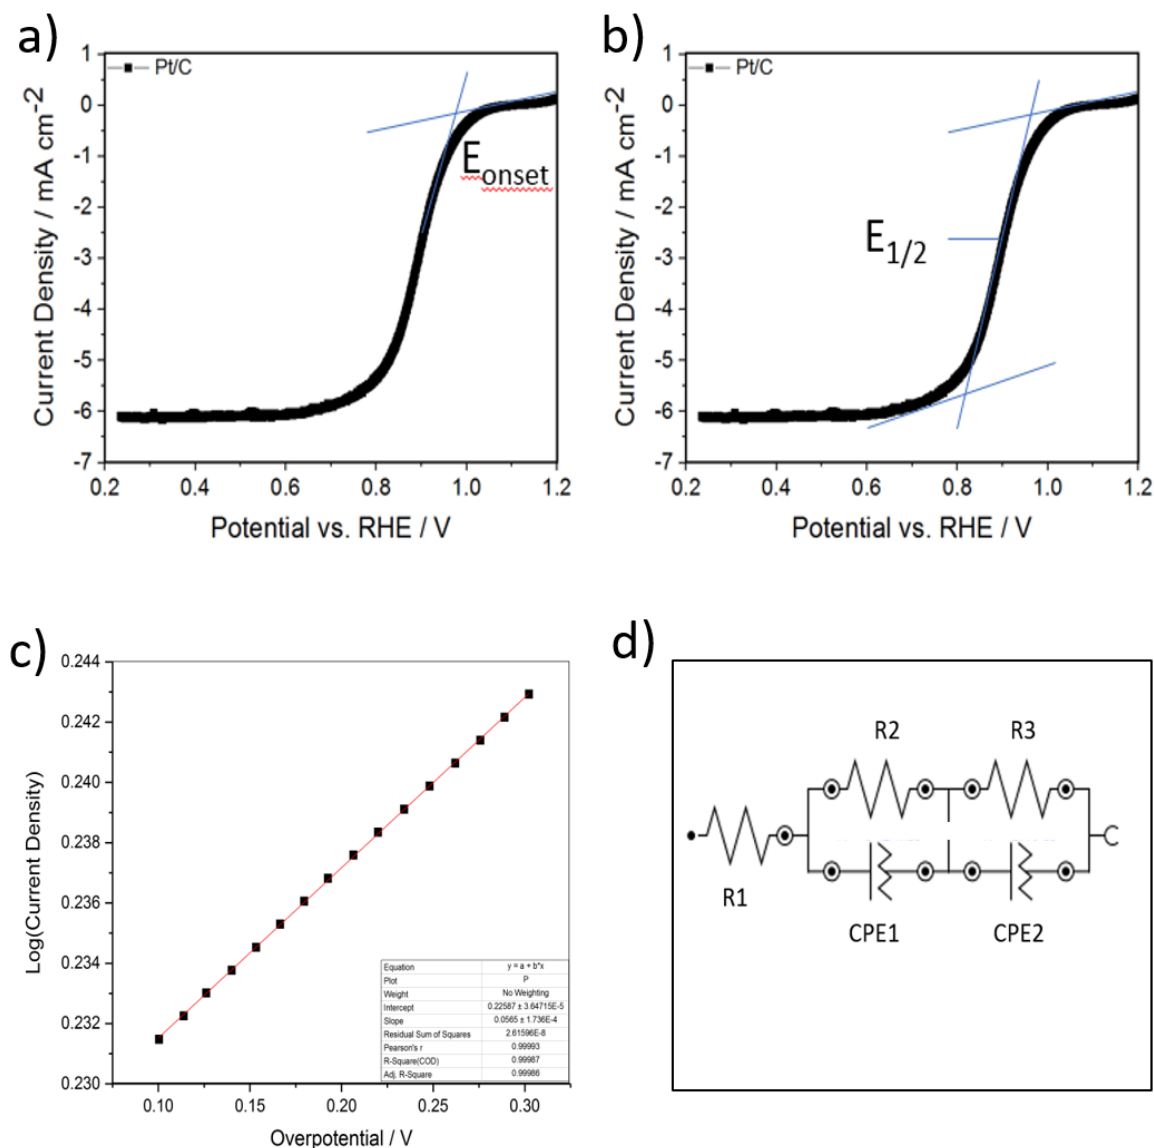

**Fig. S5** a) Illustration of the tangential method (blue) of determining ORR onset and b) half-wave potentials for Pt/C. c) Tafel slope plot of the commercial RuO<sub>2</sub> catalyst derived from the LSV curves from Figure 4. d) Idealized circuit layout of the Zn-air cells made with cobalt-nickel sulfide catalysts as cathodes, derived from Nyquist plots from Figure 6c.

## S6. Determination of Electrochemical Surface Area (ECSA) from Electrochemical Impedance Spectroscopy

It has been argued in the literature that the double-layer capacitance of a material such as NiCo<sub>2</sub>S<sub>4</sub> is linearly proportional to the ECSA.<sup>1</sup> Acharya et al. have previously shown that ECSA can be determined from the Nyquist plots obtained from EIS results by calculating the double layer capacitance C<sub>dl</sub> given that a parallel circuit consisting of a resistor and a constant phase element are present.<sup>2,3</sup> This is given by the equation:

$$C_{dl} = \frac{(Y_0 * R_p)^{\frac{1}{n}}}{R_p},$$

Where C<sub>dl</sub> is the capacitance of the double layer (F), Y<sub>0</sub> is a parameter that relates to the magnitude of capacity (S\*s<sup>α</sup>), R<sub>p</sub> is the polarization resistance connected in parallel with the constant phase element (CPE), and n is a dimensionless exponent that relates to inhomogeneity of the surface, used to calculate CPE. The calculated C<sub>dl</sub> values for the undoped-, chromium-doped, manganese-doped, and iron-doped samples were 7.777 mF, 9.571 mF, 8.614 mF, respectively, in broad agreement with literature for NiCo<sub>2</sub>S<sub>4</sub>.<sup>1</sup>

**Table S1.** Bet surface areas of the as-synthesized pure and doped nickel cobalt sulfides.

| Sample    | Surface Area / m <sup>2</sup> g <sup>-1</sup> |
|-----------|-----------------------------------------------|
| NC11      | 10.69                                         |
| NC11 (Ti) | 19.67                                         |
| NC11 (V)  | 16.42                                         |
| NC11 (Cr) | 32.58                                         |
| NC11 (Mn) | 22.19                                         |
| NC11 (Fe) | 18.82                                         |
| NC11 (Ag) | 18.76                                         |

**Table S2.** Elemental composition results based on XRF analysis, normalized to the amount of sulphur in NiCo<sub>2</sub>S<sub>4</sub>.

| Dopant Species | Ni   | Co   | S | Dopant |
|----------------|------|------|---|--------|
| Pure           | 2.42 | 2.84 | 4 | None   |
| Titanium       | 2.54 | 2.72 | 4 | 0.44   |
| Vanadium       | 2.34 | 2.73 | 4 | 0.14   |
| Chromium       | 2.06 | 2.36 | 4 | 0.39   |
| Manganese      | 2.16 | 2.50 | 4 | 0.36   |
| Iron           | 2.17 | 2.51 | 4 | 0.44   |
| Silver         | 2.14 | 2.50 | 4 | 0.37   |



**Table S3.** The average crystallite size of the as-synthesized pure and doped nickel cobalt sulfides, estimated via the Scherrer Equation from the (001) and (220) peaks of the XRD patterns.

| Sample     | Average crystallite size/nm |
|------------|-----------------------------|
| NC11       | 15.1                        |
| NC11 (Ti)  | 10.3                        |
| NC11 (V)   | 7.6                         |
| NC11 (Cr)  | 7.4                         |
| NC11 ( Mn) | 17.0                        |
| NC11 ( Fe) | 8.9                         |
| NC11 (Ag)  | 10.2                        |

## References

1. X.-Z. Song, F.-F. Sun, Y.-L. Meng, Z.-W. Wang, Q.-F. Su and Z. Tan, *New Journal of Chemistry*, 2019, **43**, 3601-3608.
2. P. Acharya, J. Burrow, M. Abolhassani and L. F. Greenlee, *ECS Transactions*, 2018, **85**, 81.
3. V. Jovic, *Gamry Instruments Inc*, 2003, 9-11.
